# Supplementary material for: Assessment of ecosystem services in restoration programs in China: A systematic review
Source: Springer Nature journal article supplement (doi:10.1007/s13280-019-01214-w), 2019-07-22
Supplement: 13280_2019_1214_MOESM1_ESM.pdf [file 13280_2019_1214_MOESM1_ESM.pdf]

Ambio

Electronic Supplementary Material

This supplementary material has not been peer reviewed.

**Title: Assessment of ecosystem services in restoration programs in China: a systematic review**

Table S1. Distribution of the reviewed papers for each ecosystem service analyzed and each ecological restoration program (total number = 89, papers in bold were counted more than once)

| Category of ecosystem service | Ecosystem service  | Reviewed papers for the Grain for Green Program (GGP)                                                                                                                                                                                                                                                                                                                 | (%) | Reviewed papers for the Natural Forest Protection Program NFPP          | (%) |
|-------------------------------|--------------------|-----------------------------------------------------------------------------------------------------------------------------------------------------------------------------------------------------------------------------------------------------------------------------------------------------------------------------------------------------------------------|-----|-------------------------------------------------------------------------|-----|
| Regulating services           | Climate regulation | Caldwell et al., 2007; Chen et al., 2007a; Li and Pang 2010; Zhang et al., 2010; Chang et al., 2011; Wang et al., 2011b; <b>Lü et al., 2012</b> ; Wang et al., 2012; Wei et al., 2012; Deng et al., 2013; Song et al., 2014; Zhao et al., 2013; Zhao et al., 2014; Zhou et al., 2014; <b>Chen et al., 2015</b> ; Zhang et al., 2016; He et al., 2016; Li et al., 2016 | 20% | Wu et al., 2011; Yu et al., 2014; Cao and Chen 2015; Jiang et al., 2017 | 4%  |
|                               | Erosion regulation | Long et al., 2006; Li et al., 2010; Fu et al., 2011; Gate et al., 2011; Xu et al., 2011; Deng et al., 2012; <b>Lü et al., 2012</b> ; <b>Lu et al., 2013</b> ; <b>Su and Fu 2013</b> ; <b>Jia et al., 2014</b> ; Sun et al., 2014; <b>Zheng et al., 2014</b> ; <b>Hayashi et al., 2015</b> ; Zhang et al., 2015; <b>Wang et al.,</b>                                   | 17% | Liu et al., 2011b; Guo et al., 2014                                     | 2%  |

|                          |                      | <b>2017</b>                                                                                                                                                                                                                                                                                                                                            |     |                                                             |    |
|--------------------------|----------------------|--------------------------------------------------------------------------------------------------------------------------------------------------------------------------------------------------------------------------------------------------------------------------------------------------------------------------------------------------------|-----|-------------------------------------------------------------|----|
| Provisioning<br>services | Water<br>regulation  | <b>McVicar et al., 2007</b>                                                                                                                                                                                                                                                                                                                            | 1%  | <b>McVicar et al., 2007</b>                                 | 1% |
|                          | Food                 | Feng et al., 2005; Deng et al., 2006;<br>Deng and Shangguan 2011; <b>Lü et al.,<br/>2012; Lu et al., 2013;</b> Sun et al.,<br>2006a; Xu et al., 2006; Wang et al.,<br>2014b; Yao and Li 2010; <b>Zheng et al.,<br/>2014; Wei et al., 2017</b>                                                                                                          | 12% |                                                             |    |
|                          | Fresh water          | Sun et al., 2006b; Chen et al., 2007b;<br><b>Zhang et al., 2008;</b> Wang et al.,<br>2011a; Feng et al., 2012; Shangguan<br>and Zheng 2010; <b>Lü et al., 2012;</b> Cuo<br>et al., 2013; <b>Su and Fu 2013; Jia et<br/>al., 2014;</b> Wang et al., 2014a; <b>Zheng<br/>et al., 2014; Hayashi et al., 2015;<br/>Wang et al., 2017; Wei et al., 2017</b> | 17% | <b>Zhang et al., 2008</b>                                   | 1% |
|                          | Fibre and<br>timber  |                                                                                                                                                                                                                                                                                                                                                        |     | Bu et al., 2008; Zhang and<br>Guan 2007; Konig et al., 2014 | 3% |
| Supporting<br>services   | Genetic<br>resources | Cleary et al., 2014; Liu et al., 2011a;<br>Zhai et al., 2014; <b>Chen et al., 2015</b>                                                                                                                                                                                                                                                                 | 4%  | Brandt et al., 2015                                         | 1% |
|                          | Primary              | <b>Su and Fu 2013; Jia et al., 2014;</b>                                                                                                                                                                                                                                                                                                               | 6%  | Yu et al., 2011; <b>Yang et al.,</b>                        | 2% |

|                   |                           |                                                                                     |    |                            |    |
|-------------------|---------------------------|-------------------------------------------------------------------------------------|----|----------------------------|----|
|                   | production                | <b>Yang et al., 2014; Wei et al., 2017;</b><br><b>Wang et al., 2017</b>             |    | <b>2014</b>                |    |
|                   | Soil formation            | Chen et al., 2008; <b>Li and Pang 2010;</b><br>Yang et al., 2012; Zhao et al., 2015 | 4% |                            |    |
| Cultural services | Recreation and ecotourism | <b>Brandt et al., 2012</b>                                                          | 1% | <b>Brandt et al., 2012</b> | 1% |

Table S2. Proxy model examples used in ecosystem services approaches

| <b>ES</b>          | <b>Proxy</b>      | <b>Models and tools</b>                             | <b>References</b>                                                                                         |
|--------------------|-------------------|-----------------------------------------------------|-----------------------------------------------------------------------------------------------------------|
| Climate regulation | Vegetation carbon | Canonical correspondence analysis                   | Zhang et al., 2016                                                                                        |
|                    |                   | Integrated assessment model                         | Caldwell et al., 2007                                                                                     |
| Erosion regulation | Soil erosion      | Revised Universal Soil Loss Equation                | Xu et al., 2011; Lu et al., 2013; Sun et al., 2014; Wang et al., 2017                                     |
|                    |                   | Universal Soil Loss Equation                        | Long et al., 2006; Fu et al., 2011; Lü et al., 2012; Su and Fu 2013; Jia et al., 2014; Zheng et al., 2014 |
|                    |                   | Statistical analysis                                | Deng et al., 2012                                                                                         |
|                    |                   | Hydrological simulation program-FORTRAN model       | Hayashi et al., 2015                                                                                      |
| Food production    | Crop production   | Agro-ecological zones methodology                   | Deng et al., 2006                                                                                         |
|                    |                   | Agricultural policy simulation and projection model | Xu et al., 2006                                                                                           |
|                    |                   | Land loss and grain productivity                    | Feng et al., 2005; Sun et al., 2006a                                                                      |
|                    |                   | Energy density                                      | Wang et al., 2014b                                                                                        |
|                    |                   | Crop production model                               | Zheng et al., 2014                                                                                        |
|                    |                   | Statistical analysis                                | Deng and Shangguan 2011; Lü et al., 2012; Wei et al., 2017                                                |
|                    |                   | Spatial analysis                                    | Lu et al., 2013                                                                                           |
| Fibre and          | Timber production | LANDIS model                                        | Bu et al., 2008                                                                                           |

|                    |                               |                                                                     |                                                                                        |
|--------------------|-------------------------------|---------------------------------------------------------------------|----------------------------------------------------------------------------------------|
| timber             |                               | Computable general equilibrium model                                | Zhang and Guan 2007                                                                    |
|                    |                               | Surface energy balance algorithm for land and Thornthwaite's method | Zhang et al., 2008                                                                     |
|                    |                               | Integrated valuation of ecosystem services and tradeoffs model      | Su and Fu 2013; Jia et al., 2014; Zheng et al., 2014; Wang et al., 2017                |
| Water production   | Water yield/runoff/steam flow | Hydrology-land use model                                            | Zhang et al., 2008; Feng et al., 2012; Lü et al., 2012; Wei et al., 2017               |
|                    |                               | Water carry capacity method                                         | Wang et al., 2014a                                                                     |
|                    |                               | Water yield response model                                          | Sun et al., 2006b; Wang et al., 2011a                                                  |
|                    |                               | Hydrological simulation program-FORTRAN model                       | Hayashi et al., 2015                                                                   |
| Primary production | NPP                           | Carnegie–Ames–Stanford approach                                     | Yu et al., 2011; Su and Fu 2013; Jia et al., 2014; Wang et al., 2017; Wei et al., 2017 |

## References

1. Brandt, J. S., T. Kuemmerle, H. Li, G. Ren, J. Zhu, and V.C. Radeloff. 2012. Using Landsat imagery to map forest change in southwest China in response to the national logging ban and ecotourism development. *Remote Sensing of Environment* 121: 358-369.
2. Brandt, J.S., V. Butsic, B. Schwab, T. Kuemmerle, and V.C. Radeloff. 2015. The relative effectiveness of protected areas, a logging ban, and sacred areas for old-growth forest protection in southwest China. *Biological Conservation* 181: 1-8.
3. Bu, R., H.S. He, Y. Hu, Y. Chang, and D.R. Larsen. 2008. Using the LANDIS model to evaluate forest harvesting and planting strategies under possible warming climates in Northeastern China. *Forest Ecology and Management* 254: 407-419.
4. Caldwell, I.M., V.W. Maclaren, J.M. Chen, W.M. Ju, S. Zhou, Y. Yin, and A. Boland. 2007. An integrated assessment model of carbon sequestration benefits: A case study of Liping County, China. *Journal of Environment Management* 85: 757-773.
5. Cao, Y., and Y. Chen. 2015. Biomass, Carbon and Nutrient Storage in a 30-Year-Old Chinese Cork Oak (*Quercu Variabilis*) Forest on the South Slope of the Qinling Mountains, China. *Forests* 6: 1239-1255.
6. Chang, R., B. Fu, G. Liu, and S. Liu. 2011. Soil carbon sequestration potential for grain for green project in Loess Plateau, China. *Environmental Management* 48: 1158-1172.
7. Chen, H., M. Shao, and Y. Li. 2008. The characteristics of soil water cycle and water balance on steep grassland under natural and simulated rainfall conditions in the Loess Plateau of China. *Journal of Hydrology* 360: 242-251.
8. Chen, J., X. Lee, K.G. Theng, L. Zhang, B. Fang, and F. Li. 2015. Biomass accumulation and carbon sequestration in an age-sequence of *Zanthoxylum bungeanum* plantations under the Grain for Green Program in karst regions, Guizhou province. *Agricultural and Forest Meteorology* 203: 88-95.
9. Chen, L., J. Gong, B. Fu, Z. Huang, Y. Huang, and L. Gui. 2007a. Effect of land use conversion on soil organic carbon sequestration in the loess hilly area, loess plateau of China. *Ecological Research* 22: 641-648.
10. Chen, L., Z. Huang, J. Gong, B. Fu, and Y. Huang. 2007b. The effect of land cover/vegetation on soil water dynamic in the hilly area of the loess plateau, China. *Catena* 70: 200-208.

11. Cleary, E., T. S. Barnes, Y. Xu, H. Zhao, A.C.A. Clements, D. J. Gray, D. P. McManus, J. M. Atkinson, et al. 2014. Impact of “Grain to Green” Programme on echinococcosis infection in Ningxia Hui Autonomous Region of China. *Veterinary Parasitology* 205: 523-531.
12. Cuo, L., Y. Zhang, Y. Gao, Z. Hao, and L. Cairang. 2013. The impacts of climate change and land cover/use transition on the hydrology in the upper Yellow River Basin, China. *Journal of Hydrology* 502: 37-52.
13. Deng, L., and Z.P. Shangguan. 2011. Food security and farmers income: impacts of the grain for green programme on rural households in China. *Journal of Food, Agriculture and Environment* 9: 826-831.
14. Deng, L., Z.P. Shangguan, and R. Li. 2012. Effects of the grain-for-green program on soil erosion in China. *International Journal of Sediment Research* 27: 120-127.
15. Deng, L., K. Wang, L. Chen, Z. Shangguan, and S. Sweeney. 2013. Soil organic carbon storage capacity positively related to forest succession on the Loess Plateau, China. *Catena* 110: 1-7.
16. Deng, X.Z., J.K. Huang, S. Rozelle, and E. Uchida. 2006. Cultivated land conversion and potential agricultural productivity in China. *Land Use Policy* 23: 372-384.
17. Feng, X.M., G. Sun, B. Fu, C.H. Su, Y. Liu, and H. Lamparski. 2012. Regional effects of vegetation restoration on water yield across the Loess Plateau, China. *Hydrology and Earth System Sciences* 16: 2617–2628.
18. Feng, Z., Y. Yang, Y. Zhang, P. Zhang, and Y. Li. 2005; Grain-for-green policy and its impacts on grain supply in West China. *Land Use Policy* 22: 301-312.
19. Fu, B.J., Y. Liu, Y.H. Lu, C.S. He, Y. Zeng, and B.F. Wu. 2011. Assessing the soil erosion control service of ecosystems change in the Loess Plateau of China. *Ecological Complexity* 8: 284-293.
20. Gate, J.B., B.R. Scanlon, X. Mu, and L. Zhang. 2011. Impacts of soil conservation on groundwater recharge in the semi-arid Loess Plateau, China. *Hydrogeology Journal* 19: 865-875.
21. Guo, Z., N. Huang, Z. Dong, P.R. Van, and T. Zobeck. 2014. Wind erosion induced soil degradation in Northern China: Status, measures and perspective. *Sustainability* 6: 8951–8966.

22. Hayashi, S., S. Murakami, K.Q. Xu, and M. Watanabe. 2015. Simulation of the reduction of runoff and sediment load resulting from the Gain for Green Program in the Jialingjiang catchment, upper region of the Yangtze River, China. *Journal of Environmental Management* 149:126–137.
23. He, S., Z. Liang, R. Han, Y. Wang, and G. Liu. 2016. Soil carbon dynamics during grass restoration on abandoned sloping cropland in the hilly area of the Loess Plateau, China. *Catena* 137: 679-685.
24. Jia, X.Q., B. Fu, X.M. Feng, G.H. Hou, Y. Liu, and X.F. Wang. 2014. The tradeoff and synergy between ecosystem services in the Grain-for-Green areas in Northern Shaanxi, China. *Ecological Indicators* 43: 103-113.
25. Jiang, P., Y. Chen, and Y. Cao. 2017. C:N:P stoichiometry and carbon storage in a naturally-regenerated secondary *Qercus variabilis* forest age sequence in the Qinling Mountains, China. *Forests* 8: 281.
26. Konig, H.J., L. Zhen, K. Helming, S. Uthes, L. Yang, X. Cao, and H. Wiggering. 2014. Assessing the impact of the sloping land conservation programme on rural sustainability in Guyuan, western China. *Land Degradation & Development* 25: 385-396.
27. Li, C., J. Qi, Z. Feng, R. Yin, B. Guo, F. Zhang, S. Zou. 2010. Quantifying the effect of ecological restoration on soil erosion in China's Loess Plateau region: An application of the MMP approach. *Environmental Management* 45: 476-485.
28. Li, G., and X. Pang., 2010. Effect of land-use conversion on C and N distribution in aggregate fractions of soils in the southern Loess Plateau, China. *Land Use Policy* 27: 706-712.
29. Li, Q., D. Chen, L. Zhao, X. Zhao, X. Yang, and X. Zhao. 2016. More than a century of Grain for Green Program is expected to restore soil carbon stock on alpine grassland revealed by field <sup>13</sup>C pulse labeling. *Science of the Total Environment* 550: 17-26.
30. Liu, X., W. Zhang, Z. Liu, F. Qu, and X. Tang. 2011a. Changes in species diversity and above-ground biomass of shrubland over long-term natural restoration process in the Taihang Mountain in North China. *Plant, Soil and Environment* 57: 505-512.
31. Liu, X., Y. Lu, Y. Zhou, X. Lei, X. Zhang, and J. Meng. 2011b. The influence of soil conditions on regeneration establishment for degraded secondary forest restoration, Southern China. *Forest Ecology and Management* 261: 1771–1780.

32. Long, H.L., G.K. Heilig, J. Wang, X.B. Li, M. Luo, X.Q. Wu, and M. Zhang. 2006. Land use and soil erosion in the upper reaches of the Yangtze River: Some Socio-Economic Considerations on China's Grain-for-Green Programme. *Land Degradation & Development* 17: 589–603.
33. Lu, Q., B. Xu, F. Liang, Z. Gao, and J. Ning. 2013. Influences of Grain-for-Green project on grain security in southern China. *Ecological Indicators* 34: 616-622.
34. Lü, Y., B. Fu, X. Feng, Y. Zeng, Y. Liu, R. Chang, G. Sun, and B. Wu. 2012. A Policy-Driven Large Scale Ecological Restoration: Quantifying Ecosystem Services Changes in the Loess Plateau of China. *PLoS ONE* 7(2): e31782.
35. McVicar, T.R., L.T. Li, T.G. Van Niel, L. Zhang, R. Li, Q. Yang, X.P. Zhang, et al. 2007. Developing a decision support tool for China's re-vegetation program: Simulating regional impacts of afforestation on average annual streamflow in the Loess Plateau. *Forest Ecology and Management* 251: 65-81.
36. Shangguan, Z.P., and S.X. Zheng. 2010. Ecological properties of soil water and effects on forest vegetation in the Loess Plateau. *International Journal of Sustainable Development and World Ecology* 13: 307-314.
37. Song, X., C. Peng, G. Zhou, H. Q. Jiang, and W. Wang. 2014. Chinese Grain for Green Program led to highly increased soil organic carbon levels: A meta-analysis. *Scientific Reports* 4: 4460.
38. Su, C.H., and B. Fu. 2013. Evolution of ecosystem services in the Chinese Loess Plateau under climatic and land use changes. *Global and Planetary Change* 101: 119-128.
39. Sun, D.F., L. Hong, R. Dawson, C.J. Tang, and L.X. Wen. 2006a. Characteristics of steep cultivated land and the impact of the Grain-for-Green policy in China. *Pedosphere* 16: 215-223.
40. Sun, G., G. Zhou, Z. Zhang, X. Wei, S.G. McNulty, and J.M. Vose. 2006b. Potential water yield reduction due to forestation across China. *Journal of Hydrology* 328: 548-558.
41. Sun, W., Q. Shao, J. Liu, and J. Zhai. 2014. Assessing the effects of land use and topography on soil erosion on the Loess Plateau in China. *Catena* 121: 151-163.
42. Wang, J., J. Peng, M. Zhao, Y. Liu, and Y. Chen. 2017. Significant trade-off for the impact of Grain-for-Green Programme on ecosystem services in North-western Yunnan, China. *Science of the Total Environment* 574: 57-64.

43. Wang, N., J. Xie, J. Han, and L. Luo. 2014a. A comprehensive framework on land-water resources development in Mu Us Sandy Land. *Land Use Policy* 40: 69-73.
44. Wang, S., B. Fu, C.S. He, G. Sun, and G.Y Gao. 2011a. A comparative analysis of forest cover and catchment water yield relationships in northern China. *Forest Ecology and Management* 262: 1189-1198.
45. Wang, X., J. Shen, and W. Zhang. 2014b. Energy evaluation of agricultural sustainability of Northwest China before and after the grain-for green policy. *Energy Policy* 67: 508-516.
46. Wang, Y., B. Fu, Y. Lu, and L. Chen. 2011b. Effects of vegetation restoration on soil organic carbon sequestration at multiple scales in semi-arid Loess Plateau, China. *Catena* 85: 58-66.
47. Wang, Z., G. Liu, M. Xu, J. Zhang, Y. Wang, and L. Tang. 2012. Temporal and spatial variation in soil organic carbon sequestration following revegetation in the hilly Loess Plateau, China. *Catena* 99: 26-33.
48. Wei, J., J. Cheng, W. Li, and W. Liu. 2012. Comparing the Effect of Naturally Restored Forest and Grassland on Carbon Sequestration and Its Vertical Distribution in the Chinese Loess Plateau. *PLoS ONE* 7(7): e40123.
49. Wei, H., W. Fan, Z. Ding, B. Weng, K. Xing, X. Wang, N. Lu, S. Ulgiati, and X. Dong. 2017. Ecosystem Services and Ecological Restoration in the Northern Shaanxi Loess Plateau, China, in Relation to Climate Fluctuation and Investments in Natural Capital. *Sustainability* 9: 199.
50. Wu, R.D., S. Zhang, D.W. Yu, P. Zhao, X. Li, L. Wang, Q. Yu, J. Ma, et al. 2011. Effectiveness of China's nature reserves in representing ecological diversity. *Frontiers in Ecology and the Environment* 9: 383-389.
51. Xu, Z.G., J.T. Xu, X.Z. Deng, J.K. Huang, S. Rozelle, and E. Uchida. 2006. Grain for Green and Grain: A Case Study of the Conflict between Food Security and the Environment in China. *World Development* 34: 130-48.
52. Xu, Y., D. Luo, and J. Peng. 2011. Land use change and soil erosion in the Maotiao River watershed of Guizhou Province. *Journal of Geographical Sciences* 21: 1138-1152.
53. Yao, S., and H. Li. 2010. Agricultural productivity changes induced by the sloping land conversion program: An analysis of Wuqi County in the Loess Plateau region. *Environment Management* 45: 541-550.

54. Yang, L., W. Wei, L. Chen, and B. Mo. 2012. Response of deep soil moisture to land use and afforestation in the semi-arid Loess Plateau, China. *Journal of Hydrology* 475: 111-122.
55. Yang, L., W. Wei, L. Chen, W. Chen, and J. Wang. 2014. Response of temporal variation of soil moisture to vegetation restoration in semi-arid Loess Plateau, China. *Catena* 115: 123-133.
56. Yu, J., S. Yao, and B. Zhang. 2014. Designing afforestation subsidies that account for the benefits of carbon sequestration: A case study using data from China's Loess Plateau. *Journal of Forest Economics* 20: 65-76.
57. Yu, D.Y., P.J. Shi, G.Y. Han, W.Q. Zhu, S.Q. Du, and B. Xun. 2011. Forest ecosystem restoration due to a national conservation plan in China. *Ecological Engineering* 37: 1387-1397.
58. Zhai, D., J. Xu, Z. Dai, C.H. Cannon, and R. E. Grumbine. 2014. Increasing tree cover while losing diverse natural forests in tropical Hainan, China. *Regional Environmental Change* 14: 611-621.
59. Zhao, F., S. Chen, X. Han, Y. Feng, and G. Ren. 2013. Policy-Guided Nationwide Ecological Recovery: Soil Carbon Sequestration Changes Associated With the Grain-to-Green Program in China. *Soil Science* 178.
60. Zhao, F., G. Yang, X. Han, Y. Feng, and G. Ren. 2014. Stratification of Carbon Fractions and Carbon Management Index in Deep Soil Affected by the Grain-to-Green Program in China. *PLoS ONE* 9(6): e99657.
61. Zhao, F., J. Sun, C. Ren, D. Kang, J. Deng, X. Han, G. Yang, Y. Feng, and G. Ren. 2015. Land use change influences soil C, N, and P stoichiometry under Grain-to-Green Program in China. *Scientific Reports* 5: 10195.
62. Zhang, J., and J. Guan. 2007. Who will Meet China's Import Demand for Forest Products? *World Development* 35: 2150-2160.
63. Zhang J., T. Wang, and J. Ge. 2015. Assessing Vegetation Cover Dynamics Induced by Policy-Driven Ecological Restoration and Implication to Soil Erosion in Southern China. *PLoS ONE* 10(6): e0131352.
64. Zhang, K., H. Dang, S. Tan, X. Cheng, and Q. Zhang. 2010. Change in soil organic carbon following the 'Grain-for-Green' programme in China. *Land Degradation & Development* 21: 16-28.

65. Zhang, M., K. Wang, H. Liu, J. Wang, C. Zhang, Y. Yue, and X. Qi. 2016. Spatio-Temporal Variation and Impact Factors for Vegetation Carbon Sequestration and Oxygen Production Based on Rocky Desertification Control in the Karst Region of Southwest China. *Remote Sensing* 8: 102.
66. Zhang, Y., S. Liu, X. Wei, J. Liu, and G. Zhang. 2008. Potential Impact of Afforestation on Water Yield in the Sub-Alpine Region of Southwestern China. *Journal of the American Water Resources Association* 44: 1144-1153.
67. Zheng, Z., B. Fu, H. Hu, and G. Sun. 2014. A method to identify the variable ecosystem services relationship across time: a case study on Yanhe Basin, China. *Landscape Ecology* 29: 1689-1696.
68. Zhou, D., S. Zhao, S. Liu, and L. Zhang. 2014. Modelling the effects of the Sloping Land Conversion Program on terrestrial ecosystem carbon dynamic in the Loess Plateau: A case study with Ansai County, Shaanxi province, China. *Ecological Indicators* 288: 47-54.
